# Supplementary material for: Functional Annotations of Paralogs: A Blessing and a Curse
Source: MDPI journal article supplement (doi:10.3390/life6030039), 2016-09-08
Supplement: s1 [file s1]

# Supplementary Materials: Functional Annotations of Paralogs: A Blessing and a Curse

Rémi Zallot, Katherine J. Harrison, Bryan Kolaczowski and Valérie de Crécy-Lagard

Sequences selected from pubSEED to generate and compare logos

>fig|1007123.3.peg.641 Q6-carboxytetrahydropterin synthase (EC 4.1.2.50) @ Queuosine biosynthesis QueD, PTPS-I [SAR406 cluster bacterium SCGC AAA160-I06]

MFQLTRKYEFAARKLTMLDVDHPCSQLHGHTFSVVLELSGEIDSSKGWVVDYDIDKIYKDEIH  
ALLDHKHLNDIEELSNTPTTELIKWIWNRIQPNLSGLTGVTVSEGPSYSCTYRGV

>fig|102127.3.peg.996 6-pyruvoyl tetrahydrobiopterin synthase (EC 4.2.3.12) [Geitlerinema sp. PCC 7105]>fig|102127.3.peg.996 6-pyruvoyl tetrahydrobiopterin synthase (EC 4.2.3.12) [Geitlerinema sp. PCC 7105]

MQASLTVSTHFSAAHRLARPDLDTNCGIYGKCARPHGHGHHDYHLDVTVRGTTIDPRTGMVVE  
LGALHGVLEQIEVIEPLDHRFLNKDIPYFADRVPTAEHIAIYIRDILQEPLRQLGVTLKVKLYESP  
NSCEVYGRSSNSATPATTAKPKLVLV

>fig|1075091.3.peg.1875 6-carboxytetrahydropterin synthase (EC 4.1.2.50) @ Queuosine biosynthesis QueD, PTPS-I / Folate biosynthesis protein PTPS-III, catalyzes a reaction that bypasses dihydroneopterin aldolase (FolB) [Clostridium sporogenes PA 3679]

MILIKKFKFDAAHNLIHYHGKERCRLHGHTYGVVVKISGEPDKEDMVIDFTELKAIVKENVLDILDH  
AYINEIHKQPTAENIAVWIWDKLYTKLRDNCSLYEIEVWETETSGVVYSG

>fig|1075091.3.peg.976 6-carboxytetrahydropterin synthase (EC 4.1.2.50) @ Queuosine biosynthesis QueD, PTPS-I [Clostridium sporogenes PA 3679]

MYTLKVEHSFDSAHLANYEGKCGNIHGHRWKVEIQIKSESLVQGGQLDGMVIDFGDLKKDVKS  
MVDYYDHALLIEKETMREQSLSSLKEDGFRIIEVNFRPTAENFAAFFYKFMKDKGYNVKSVTVYET  
PNNSATYEEESGVI

>fig|1079986.3.peg.3739 6-carboxytetrahydropterin synthase (EC 4.1.2.50) @ Queuosine biosynthesis QueD, PTPS-I [Streptomyces chartreusis NRRL 12338]

MEIFREFTFEAAHRLPRVPEGHKCARLHGHSYKVTVHVHVEAPVEPEAGWVMDFGDIKQAFKPIDA  
QLDHYYLNDIEGLDNPTSENLARWIWDRMVTELPGLSAITVRETCTSGCTYRGE

>fig|1121904.3.peg.2753 6-pyruvoyl tetrahydrobiopterin synthase (EC 4.2.3.12) [Flexithrix dorotheae DSM 6795]>fig|1121904.3.peg.2753 6-pyruvoyl tetrahydrobiopterin synthase (EC 4.2.3.12) [Flexithrix dorotheae DSM 6795]

MHNPEWSEQKNAEVFGLCNNPNYHGHNYDLIVKVTGEVDPETGYVIDLKILKSIKDEILDKFDH  
KNLNLDTPEFKSLNPTAENIAVVIWEKLRKKLEPKFDLKVTLTYETERNFVEYPAS

>fig|1122169.3.peg.1233 Folate biosynthesis protein PTPS-III, catalyzes a reaction that bypasses dihydroneopterin aldolase (FolB) [*Legionella shakespearei* DSM 23087]

MKRYLTTELQKESMKFSAGHTTIFSATEREPLHGHMYCVYLALTTWVEENGMTFDYRYKERI  
HVLCHQLNQTFLLMPQFSPFLQYAEDDEYYYFTFNHKKIPFLKEDVTLMPLSNITVEELSRWVFNE  
LIKDTEELDRHRIEKVVVKVFSAPGQSANHEWHRVK

>fig|1144275.3.peg.1442 Folate biosynthesis protein PTPS-III, catalyzes a reaction that bypasses dihydroneopterin aldolase (FolB) [*Coralloccoccus coralloides* DSM 2259]

MAPRTTTELHKEEMKFSAGHTTIFSATHRENHGHNFVYVALTGEVSDDGLLSYDGPLKQAI  
QRCKAWNETFFLPAHSKHLRLERDEKGNHVAHFNGEELRFLARDVTVPVANVSLEELARVFGE  
ELVGDGSAMARDHITGLVVKCASGPGQWASWEWKRDV

>fig|1178537.3.peg.3009 6-pyruvoyl tetrahydrobiopterin synthase (EC 4.2.3.12) [*Bacillus* sp. HYC-10]>fig|1178537.3.peg.3009 6-pyruvoyl tetrahydrobiopterin synthase (EC 4.2.3.12) [*Bacillus* sp. HYC-10]

MLYLSRKMYFSSLHSYRVKEWSDEYNQQVFGPCSNPNHGHGHDYTLVEMVKGKLNQRSGIVVNI  
TDIDKVVKSFAENLDGKFLNMENDYFKHHIPTTENIATYLVESLDGKIDHCQIHKIRLHENNFL  
YSEKEDGQLVRLTRKYHFCTAHLRHSEQLSEEENQELFGKCNNPYGHGHNYYLEVTVNGEPPDPV  
TGMIANLSDDISVVEKEIMERFDHKHLNLDTEEFKDLNPTSENVAVVIWDLSPQLTNLFKIGLYE  
TEKNYFEYCGPQEDMKYGA

>fig|1178537.3.peg.3654 6-carboxytetrahydropterin synthase (EC 4.1.2.50) @ Queuosine biosynthesis QueD, PTPS-I [*Bacillus* sp. HYC-10]

MLSQIYPQTDHPFSFELNKMHLASAAHFVPREEAGACSRVHGHTYTINITIAGDDLDESGFLVNF  
STLKKLIHGQYDHTLLNDHEEFSSNDPYAMPTTEVVAKTVYDKVAAYLTTLANKPVCVQVFVRE  
TPTSYCIYRPKRVELK

>fig|1193806.4.peg.1496 Queuosine biosynthesis QueD, PTPS-I / Folate biosynthesis protein PTPS-III, catalyzes a reaction that bypasses dihydroneopterin aldolase (FolB) [*Dehalococcoides mccartyi* BTF08]

MYLSIKKHFEAAHFLRGYKGKCNELHGHRYEVALKIKTGELDECGMGADFSLLKTRLNEVLQS  
YDHTCLNDLTPFDNINPSAENIAKDIYDKLKTIVINKKGVELWGVEVWESPSSVLYQPD

>fig|1237500.3.peg.5547 6-carboxytetrahydropterin synthase (EC 4.1.2.50) @ Queuosine biosynthesis QueD, PTPS-I [*Nocardiosis ganjiahuensis* DSM 45031]

MRHNFETAHRLPHLGKCTNLHGHSWWVEVSAVAPTLDSGTVVEFGTFKSALRSWIDTYLDHG  
AMLGFDDPMAKLLADHGSKLFRFGAPDPLPAEPPAGDLPHTVEAVAVLLGRVAEEALSGLAH  
VPGARIDTVSVTETHVNNAVWRNGPR

>fig|1297570.3.peg.3873 6-carboxytetrahydropterin synthase (EC 4.1.2.50) @ Queuosine biosynthesis QueD, PTPS-I [*Mesorhizobium* sp. STM 4661]

MFRITKEFHFSASHQLTSLPPDHQCARLHGHNYIVVVELSGGELDEHGFVRDYQDLASLKHYIDG  
TFDHRHLNDVLGHDRVTAELARHFYDWCKVRLPQTSVAVRVSETPKTWAEFRP

>fig|1303518.3.peg.92 6-pyruvoyl tetrahydrobiopterin synthase (EC 4.2.3.12) [Chthonomonas calidirosea T49]>fig|1303518.3.peg.92 6-pyruvoyl tetrahydrobiopterin synthase (EC 4.2.3.12) [Chthonomonas calidirosea T49]

MLIMTRRLYFAAAHRDIQGSSELTGHTYTLDDVAVSGHINERTGLLVNIKELDRIVKEHVLNQIDGK  
CLNDRLSFFQAHLATPENIATYIAGTVHPFLPSDIHLHSVRLQPTPVLYTEWLSSLKEVSHMLLTKI  
YEFSASHRLHSDLSAEENRTLFGKCNNPNNGHGHNYELEVTCGPNPITGRVLPPERLDAVVERE  
VLSRYDHRYLNLDVPEFAHVVPSEAEMIVKTIWERLRPCIPAPARLYRLRLYETPRNLFYSEEDDK  
EQR

>fig|1308866.3.peg.1216 6-pyruvoyl tetrahydrobiopterin synthase (EC 4.2.3.12) [Gracilibacillus halophilus YIM-C55.5]>fig|1308866.3.peg.1216 6-pyruvoyl tetrahydrobiopterin synthase (EC 4.2.3.12) [Gracilibacillus halophilus YIM-C55.5]

MLYLSRRIDFSAMHHYRIDAWTEEQNRRIFGLCSNPNGHGHHDYQLEVMVRGQLNPDYGVVVNT  
TDIKASVGEYVREELDGKYLNKEHPYFMKHVPTTEQLVTFWQGIEPKLTNCELYRLRLHENPYI  
VAEKGDHEMVRRLTRKYHFSAHRLHSEQLSEQENQYFFGKCNNPYGHGHNYLEVTVCGEPDP  
ITGMITDLAELDATVDQVILEKMDHKHLNLDVAEFRDVPNTSEVVAKVIYDMLSPYISNLDKVG  
LWETEKNYFEYAGEEVDV

>fig|224911.5.peg.2435 Folate biosynthesis protein PTPS-III, catalyzes a reaction that bypasses dihydroneopterin aldolase (FolB) [Bradyrhizobium japonicum USDA 110]

MWELTKSFRFEAAHSLSGTTFGAASEEIHGHFSFRAEVTVRGTPDPETGMVVDLGLLQRAIEDVRL  
TLDHKFLNKIEALGKPTLENLSRFVWERLQHIGKLTRVSIHRDSCNESCTYYGPQG

>fig|235909.3.peg.1842 6-carboxytetrahydropterin synthase (EC 4.1.2.50) @ Queuosine biosynthesis QueD, PTPS-I [Geobacillus kaustophilus HTA426]

MMHQLYPQVAHHYRYELNKDMHIAAAHFIPHEAAGSCANVHGHTYIVNVTVAGDELDESGFL  
VNFQTLKQLVHRKLDHTLLNDHSDWFDGHDPNRFPPTSEVVARTIYETIQRYLDTLPHKPKCLQV  
FVRETPTSYYVYRPAKAGER

>fig|235909.3.peg.319 6-pyruvoyl tetrahydrobiopterin synthase (EC 4.2.3.12) [Geobacillus kaustophilus HTA426]>fig|235909.3.peg.319 6-pyruvoyl tetrahydrobiopterin synthase (EC 4.2.3.12) [Geobacillus kaustophilus HTA426]

MTRRYFSSAHLHSDQLTNEENQRLFGKCNNRYGHGHNYCLEVTVIGKPDPITGMVVNLAEL  
DEIVNREVLVKFDHKHLNLDTDEFKQINPTAENIVIVIWELLAPHLSSLYKIGLWETQKNYFEYFG  
PHKEK

>fig|272844.1.peg.1490 Folate biosynthesis protein PTPS-III, catalyzes a reaction that bypasses dihydroneopterin aldolase (FolB) [Pyrococcus abyssi GE5]

MRARIIVRTSFDAAHAVKIGDDWESLHGHTFFLEVAVEGEIKRGYIMDFTELKIVDDIVKELNHR  
NLNKIFDNPTTENVALWIAEKVEEKLPKVKLKRVLWEGKDNGVELEW

>fig|309798.4.peg.91 6-carboxytetrahydropterin synthase (EC 4.1.2.50) @ Queuosine biosynthesis QueD, PTPS-I / Folate biosynthesis protein PTPS-III, catalyzes a reaction that bypasses dihydroneopterin aldolase (FolB) [Coprothermobacter proteolyticus DSM 5265]

MNVCVTKAFTFDAAHNLTNYKKGKCEALHGHTYRLEVTVCCTPNELENGLLMDFGDLKDLV NK  
EVLSKLDHSYLNDHFEQPSTELVAMWVFETLKPHEKLGVLTSVKLFETATSWVEIKADASRGD

>fig|313612.3.peg.4950 6-carboxytetrahydropterin synthase (EC 4.1.2.50) @ Queuosine biosynthesis QueD, PTPS-I [Lyngbya sp. PCC 8106]

MTSNQEEIPKIKRAESNSETWMIGKEFRFEASHQLPNHDGKCARLHGHSWRGVIYVSGNKLIDA  
GAKQGMIMDYEDIKKYLKPLDDYLDHYHLNETTGLNNPTSEAIKWYEQLEDKIPGLVAVRID  
ETCTSQCVYSKGTSHVFL

>fig|316274.3.peg.132 6-pyruvoyl tetrahydrobiopterin synthase (EC 4.2.3.12) [Herpetosiphon aurantiacus ATCC 23779]>fig|316274.3.peg.132 6-pyruvoyl tetrahydrobiopterin synthase (EC 4.2.3.12) [Herpetosiphon aurantiacus ATCC 23779]

MPMDVFATRFRNFSASHRYWREEWSLEQNEAVFGKCTNRYGHGHNYELFVTVAGAVDPITGM  
VMNMVELKRLVTMVLDQFDHKHLNEDTPYFREVIPTTENLVRVLWGLIEPQLPKGVRLAKRLRY  
ENSDLYAEYFGRQQQATFNRRYEFSAHRLHAQSLTDEANREIYGKCNNPNGHGHNYQLEVT  
DGLIDAQTGMVIDLVMDRRVQSVLDNWDHRHLDYQVAEFAEQPSTAENIVVVLWQRLEALF  
GSQKHLRLWETANNVFDYPLSQH

>fig|324925.4.peg.1971 6-pyruvoyl tetrahydrobiopterin synthase (EC 4.2.3.12) [Pelodictyon phaeoclathratiforme BU-1]>fig|324925.4.peg.1971 6-pyruvoyl tetrahydrobiopterin synthase (EC 4.2.3.12) [Pelodictyon phaeoclathratiforme BU-1]

MNDLLRKPRKVYVSRKIEFNAAHRLFNPLFTEQENLELYGKCSNTFGHGHNYLLDVTISGIANQE  
TGFLFDLKELEEEIARFDHKHLNHDVPELQECVPTTEVLAVLIWDILEKRLHNINRELH  
EVTIYETGKNAVRYLGE

>fig|326427.3.peg.18 6-pyruvoyl tetrahydrobiopterin synthase (EC 4.2.3.12) [Chloroflexus aggregans DSM 9485]>fig|326427.3.peg.18 6-pyruvoyl tetrahydrobiopterin synthase (EC 4.2.3.12) [Chloroflexus aggregans DSM 9485]

MVVATRREFEFSAAHRYWRDDWSAAENERVFGPYTSPYGHGHNYTLDVSITGELDERTGMVMN  
MTELKAIVNEVLEEFDHKHLNLDTPYFRDQIPTTENFVRVLWRLIAARIPAHARLAHLRLYEQPD  
LWVDYDGVGETQFARLYTFAAAHRLHAPALSDEENLAIYGKCNNPNGHGHNYTLEVTVQGEID  
PATGMLVDLAWLDQTVHSVIDLLHLHLDREIPAFERPSTAENIIVYLWNE LAPKLGRLALLR  
LWETRKNIFS YAGPASIPA

>fig|411474.6.peg.495 6-carboxytetrahydropterin synthase (EC 4.1.2.50) @ Queuosine biosynthesis QueD, PTPS-I [Coproccoccus eutactus ATCC 27759]

MYKLKTKASFDSAHLKDYEGKCSNIHGHRTVEIEVGAETLEHDTQNRGMVVDNKKDLR  
ELADHFDHSLIMETGSLKQATEDALLAENLRIVKVDFRPTAENFAKYIYDEMTSRGYNVIEASVYE  
TPNNVASYCE

>fig|415426.7.peg.182 6-carboxytetrahydropterin synthase (EC 4.1.2.50) @ Queuosine biosynthesis QueD, PTPS-I [Hyperthermus butylicus DSM 5456]

MRAPMRHRPGSGRPGVMFLVKACTMFSAAHRIEGHPRCGKIHGHNYRVCIVVREERPLQVDL  
DALEEWLERNVFQRFDHQYLNKVLAAPDKDEKLVTSEELAVLIADMLEQAFFGRVEYVEVCET  
ENLCIEYRPPRRGGFR

>fig|420247.6.peg.1034 6-carboxytetrahydropterin synthase (EC 4.1.2.50) @ Queuosine biosynthesis QueD, PTPS-I [Methanobrevibacter smithii ATCC 35061]

MKIMINGIQSNLRFSSAHVIPGHESCGYIHGHSYFVDVEIEGERAGDFEFVVDVKAYTKAICN  
ELDHRLIPVYNLDLIKDFNKKSDSIFDLKEEKTVHFVKIAGKGYSIPGEDCVFLPLPYSSAEELSKFF  
AETLTKKLAEKYDNLEYVAVGVNEGIGQGAITYKKVLDD

>fig|452637.4.peg.1627 6-pyruvoyl tetrahydrobiopterin synthase (EC 4.2.3.12) [Opitutus terrae PB90-1]>fig|452637.4.peg.1627 6-pyruvoyl tetrahydrobiopterin synthase (EC 4.2.3.12) [Opitutus terrae PB90-1]

MLRGTVFITRQVHFNAAHRLYNPTKSQAWNTNQYGLCTSPNWHGHNYVLEVTVRGEPDPETG  
YIVDLSELKRVLHETVVDRCDDRNLNDDVDFLRNVIPTTENLVIAFWQIEPALPAGKLHCVRLY  
ETPRNFAEYFGPDAPARA

>fig|460265.11.peg.7288 6-carboxytetrahydropterin synthase (EC 4.1.2.50) @ Queuosine biosynthesis QueD, PTPS-I [Methylobacterium nodulans ORS 2060]

MKITQAFTFEAAHWLPNPETHRCRRMHGHSYRVELTLDGPVDPHTGWVVDYDVEHAFAPLL  
AELDHHCLNDLPGLENPTAEHIAIWIWNRRARPALPALSSVKVFETPLSWAEYTG

>fig|467200.3.peg.1884 6-carboxytetrahydropterin synthase (EC 4.1.2.50) @ Queuosine biosynthesis QueD, PTPS-I [Streptomyces griseoflavus Tu4000]

MEIFREFTFEAAHRLPRVPEGHKCARLHGHSYKVTVHVEAPVDPEAGWVMDFGDIKQAFKPIDA  
QLDHFYLN DIEGLENPTSENLARWIWDRMTAELPALSITVRETCTSGCTYRGE

>fig|484018.6.peg.2512 6-carboxytetrahydropterin synthase (EC 4.1.2.50) @ Queuosine biosynthesis QueD, PTPS-I / Folate biosynthesis protein PTPS-III, catalyzes a reaction that bypasses dihydroneopterin aldolase (FolB) [Bacteroides plebeius DSM 17135]

MYTVIKRMEISASHKLKLSYESKCENLHGHNWIITVYCQAEQLNEDGMVVDFTHIKEVVKGQLD  
HKNLNDVLPNPTAENIARWICERVPHCVKVEVCESEGNRVIYEK

>fig|485918.5.peg.3920 6-pyruvoyl tetrahydrobiopterin synthase (EC 4.2.3.12) [Chitinophaga pinensis DSM 2588]>fig|485918.5.peg.3920 6-pyruvoyl tetrahydrobiopterin synthase (EC 4.2.3.12) [Chitinophaga pinensis DSM 2588]

MIYLTRVENFNAAHKLSNPAWSKEKNEEVFGKCANENWHGHNYELHVTVKGTPDPETGFVFN  
AKTLGVLIKDFIVEKIDHRNLNMDVDFMVGKFTSAENLAIGIWDQLTPHLPEGVELHCKLYETP  
RIYVEYFGAK

>fig|536232.3.peg.1673 6-carboxytetrahydropterin synthase (EC 4.1.2.50) @ Queuosine biosynthesis QueD, PTPS-I [Clostridium botulinum A2 str. Kyoto]

MYTLKVEHNFD SAHFLAGYEGKCGNIHGHRWKVEIQVQAESLVQGGQLDGMIDFGDLKKDKVK  
SMVDYYDHALIEKGTMRGQSLSSLKEDGFRIIEVNFRPTAENFAAFFYKIMKDRGYNVKSTTVYE  
TPNNSATYEESGVI

>fig|536232.3.peg.879 6-carboxytetrahydropterin synthase (EC 4.1.2.50) @ Queuosine biosynthesis QueD, PTPS-I / Folate biosynthesis protein PTPS-III, catalyzes a reaction that bypasses dihydroneopterin aldolase (FolB) [Clostridium botulinum A2 str. Kyoto]

MILIKKFKFDAAHNLIHYHGK CERLHGHTYGLVIKISGERDKEDMVIDFTELKAIVKENVLDILDH  
AYINEIHKQPTAENIAVWIWNKLYTKLKRDNCSLYEIEVWETETSGVVYNG

>fig|579932.3.peg.4404 6-carboxytetrahydropterin synthase (EC 4.1.2.50) @ Queuosine biosynthesis QueD, PTPS-I [Streptomyces sp. FXJ7.023]

MEIFREFTFEAAHRLPNVPEGHKCARLHGHSYKVIVHVEAPVDPESGWVMDFGDLKKAFKPLEA  
QLDHYYLNDIEGLENPTSEVLARWIWERLKPTLPDLSALT VRETCTSGCTYRGE

>fig|662475.4.peg.1371 6-carboxytetrahydropterin synthase (EC 4.1.2.50) @ Queuosine biosynthesis QueD, PTPS-I [Haloarcula californiae ATCC 33799]

MSQRLSKADNTLADAGERELVVGDRPLRISAGHRLHHDGKCSRPHGHNYEVTVRVTGELTD  
EGWVVVDKGEITDVIDEWDHRFLLEAGDPLVEAFDASGDGDAVVVLDHPPTAEVMAAILEQRLA  
DRLPETVSDVAVSVRETSELCVR

>fig|665937.3.peg.3439 6-carboxytetrahydropterin synthase (EC 4.1.2.50) @ Queuosine biosynthesis QueD, PTPS-I [Anaerostipes sp. 3\_2\_56FAA]

MYQLNTHASFDSAHLAGYEGKCRNLHGHRWKL SVTIQKEKVEEQGQTRGMVVDFGELKDKV  
KEIADEFDHALIMEKAH

>fig|70601.1.peg.620 Folate biosynthesis protein PTPS-III, catalyzes a reaction that bypasses dihydroneopterin aldolase (FolB) [Pyrococcus horikoshii OT3]

MKSRIIVRTSFDAAHAVKVG DHWEDVHGHTFFLEVAIEGEIKNGYVMDFLELRKIVEEITKELDH  
RNLNNIFENPTTENIALWIGERIRDKLPPYVKLKRVLWEGKDNGVELEW

>fig|746697.3.peg.2173 6-pyruvoyl tetrahydrobiopterin synthase (EC 4.2.3.12) [Aequorivita sublithicola DSM 14238]>fig|746697.3.peg.2173 6-pyruvoyl tetrahydrobiopterin synthase (EC 4.2.3.12) [Aequorivita sublithicola DSM 14238]

MNKIAIVRCEHFNAAHRLQNKNWSDEKNKAIFGKCNNPNYHGHNYELEVKVIGPCDPETGYVI  
DTKILSDLIKQEILDRFDHKNLNLDTLEFKDLNPTAENIAITIYNLLRPAIEAKLELKIKLYETPRNY  
VEYPH

>fig|755731.4.peg.3342 6-carboxytetrahydropterin synthase (EC 4.1.2.50) @ Queuosine biosynthesis QueD, PTPS-I [Clostridium sp. BNL1100]

MEQITITKEFTWDMAHMLAGHLGLCKNLHGHTYKMQVEICNKKDSVCERQDMVMDFKDLKDI  
IKEKIIDSFDHSFAYWKGSDDPVEIQIADALTKNGRRVVPLDFRPTAEKMAIYFHELIKEDFESKGF  
EIKKIKLWETPTSFAEYTSEKDD

>fig|857392.3.peg.196 6-pyruvoyl tetrahydrobiopterin synthase (EC 4.2.3.12) [Marinilabilia sp. AK2]>fig|857392.3.peg.196 6-pyruvoyl tetrahydrobiopterin synthase (EC 4.2.3.12) [Marinilabilia sp. AK2]

MKVSVYRKEHFNAAHRLHNPKWSFEKNQTVFGKCNNPNYHGHNYDLIVKLDGPIDPETGYVY  
DMKVLSDLIKVHVLNKFHDHKNLNIDTDEFKNLNPTAENIAVVIWNILRKEIDLKFDLTIRLYETER  
NFVEYSGD

>fig|945713.3.peg.1337 6-pyruvoyl tetrahydrobiopterin synthase (EC 4.2.3.12) [Ignavibacterium album JCM 16511]>fig|945713.3.peg.1337 6-pyruvoyl tetrahydrobiopterin synthase (EC 4.2.3.12) [Ignavibacterium album JCM 16511]

MVYITRRETFAAAHRLFIPELSDEENLKIFGKCSHPNWHGHNYTLEVVIAGEINPETGFVLDIKKL  
KEIIHKFVIDKVDHKNLNLDTFMKGLIPTSENICIAIWNQLKDKIPSGKLYSVKLYETENNYFEYR  
GE

>fig|945713.3.peg.354 6-carboxytetrahydropterin synthase (EC 4.1.2.50) @ Queuosine biosynthesis QueD, PTPS-I [Ignavibacterium album JCM 16511]

MKIAKAFRWEMGHRLPEHFGLCKNIHGHSYKMIVEFEGELNKDQMVIDYYDVEKIINPIINQLD  
HAFMVNTNDKIVLDFLEKMNSKKVVVDFDATAENICKFLLSEISKSNLPENINSVKVRVYETQFD  
YAEDTLQLK

>fig|946235.3.peg.2633 6-carboxytetrahydropterin synthase (EC 4.1.2.50) @ Queuosine biosynthesis QueD, PTPS-I [Oceanobacillus sp. Ndiop]

MYGFTIVENLQKFDKDIKRHELKYHRERVLISKEFTFDDAAHHLHCYQGKCKNLHGHTYRAVFGI  
SGYTDEIGILIDFSEIKSIWKEQIEIHLDHRYLNETLPKMNTTAENMVVWIYEKMNQVLINRPDDC  
RLEFVKLYETPTSYAEVRREWMIHE

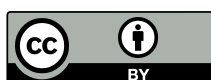

© 2016 by the authors; licensee MDPI, Basel, Switzerland. This article is an open access article distributed under the terms and conditions of the Creative Commons by Attribution (CC-BY) license (<http://creativecommons.org/licenses/by/4.0/>).
